# Supplementary material for: Myc-induced anchorage of the rDNA IGS region to nucleolar matrix modulates growth-stimulated changes in higher-order rDNA architecture
Source: PubMed Central journal article supplement — Nucleic Acids Res. 2014 Mar 7;42(9):5505–17. doi: 10.1093/nar/gku183 (PMC4027186; doi:10.1093/nar/gku183), 2014-03-07
Supplement: supp_gku183_nar-00996-y-2013-File002.pdf [file supp_gku183_nar-00996-y-2013-File002.pdf]

Supplementary Data

Myc-induced anchorage of the rDNA IGS region to nucleolar matrix modulates growth-stimulated changes in higher-order rDNA architecture

Chiou-Nan Shiue, Amir Nematollahi-Mahani, Anthony P.H.Wright\*

Clinical Research Center (KFC), Department of Laboratory Medicine and Center for Biosciences, Karolinska Institute, SE-141 86 Huddinge, Sweden

\*Correspondence should be addressed to:

Anthony Wright  
Clinical Research Center (KFC)  
Novum Level 5  
Karolinska Institute  
Karolinska University Hospital  
SE-141 86 Huddinge  
Sweden

Tel +46 8 52481155, e-mail [anthony.wright@ki.se](mailto:anthony.wright@ki.se)

## Figure Legends

### Figure Legends

**Figure 1. The non-transcribed inter-genic spacer region (IGS) of the mouse rRNA gene has an enhanced propensity for nuclear matrix attachment.**

The line graph shows the MAR-potential score in relation to nucleotide position for the rDNA repeat sequence from mouse. The lower panel shows a schematic depiction of the mouse rRNA repeat (GeneBank no. BK000964). Matrix attachment potential was predicted by MAR-Wiz software as implemented at <http://genomecluster.secs.oakland.edu> using a window size of 1000bp stepped in 100bp intervals. Scores in excess of 0.6 are generally considered as strong indicators of nuclear matrix binding potential.

**Figure 2. The digestion efficiencies of restriction enzymes at sites throughout the mammalian rDNA repeat.**

Nucleolar halos isolated from (A) growing TGR1 and (B) HeLa cells were digested with restriction enzymes as described in Materials and Methods. The upper panels depict rat and human rDNA repeats marked with restriction enzyme cutting sites and primer pairs designed for analysis of cutting efficiencies by qPCR. (C) Comparison restriction enzyme digestion of nucleolar halos from starved HeLa cells with and without serum addition and in the presence of c-Myc inhibitor, 10058-F4. (D) Analysis of cutting efficiencies of nucleolar halos from TGR1 cells in the presence or absence of treatment with Actinomycin D and c-Myc inhibitor, 10058-F4. The cutting efficiency for nucleolar halos from HO15.19 is also shown. (E) Analysis of cutting efficiencies of nucleolar halos from Rat1MycER without or with induction of Myc-ER by 4-HT in the presence or absence of 10058F4. The calculation of cutting efficiency is based on the formula:

$$\left[ 1 - 2^{-(CT_x - CT_{ic})_{Input} - (CT_x - CT_{ic})_{Ex}} \right] \times 100\%$$

“Input” represents DNA templates from nucleolar halos without restriction enzyme digestion; “Ex” indicates the DNA templates treated with restriction enzymes; CT is the threshold cycle of quantitative PCR amplification; “x” the indicated primer pairs spanning cutting sites of restriction enzymes (the sequences are shown in Supplementary Table 1-2); “ic” means internal control for DNA template loading (R0 for rat and H40 for human). The values are shown as the mean and standard deviation from three independent experiments.

**Figure 3. The anchorage sites of nucleolar matrix on human rRNA genes.**

(A) Preferential nucleolar matrix attachment on IGS of rDNA repeat. Top panel shows the scheme of rRNA repeat and amplicons representing locations throughout rDNA. The nucleolar halos isolated from growing HEK293, subjected to DNase I digestion, and separated into a non-matrix associated fraction and matrix associated fraction. (B) Myc-dependent regulation on nucleolar matrix attachment of rDNA IGS. MAR assays are performed on HeLa cells in the absence or presence of c-Myc inhibitor, 10058-F4, added prior to serum addition. The lower panel shows a statistically significant difference in pre-rRNA levels in cells untreated or treated with c-Myc inhibitor.

**Figure 4. The sequence of the rDNA non-transcribed spacer region is strongly divergent between mammalian species.**

The upper panel shows mouse rDNA repeat unit derived from GeneBank no. BK000964, containing transcribed and non-transcribed regions. The middle panel shows human rDNA derived from GeneBank no. U13369. The lower panel shows rat rDNA, derived from accession numbers X04084, X03838, X61110, X00677, X16321, V01270 and X03695. Dotted sections of the diagram represent regions where rat sequence information is incomplete. Locations of E-boxes are marked with vertical lines. The percentage identity of mouse and rat sequences compared to human sequences is noted for each coding and non-coding region.

**Figure 5. Occupancy of Myc and UBF on the human rDNA repeat.**

Growing (A) HEK293 and (B) HeLa cells were cross-linked by 0.25% formaldehyde. Nucleoli were isolated and extracted chromatin DNA was sheared to 500 bp – 1, 000 bp according to the standard ChIP assay procedure. Quantitative real-time PCR analysis of Myc/UBF binding to the rRNA gene was calculated by the amplification signals of immunoprecipitated DNA by anti-Myc/anti-UBF antibody relative to signals from rabbit serum controls. The sequences of primer sets for PCR are shown in Supplementary Table 1. The values represented means and standard deviations deriving from three independent experiments.

Figure 1

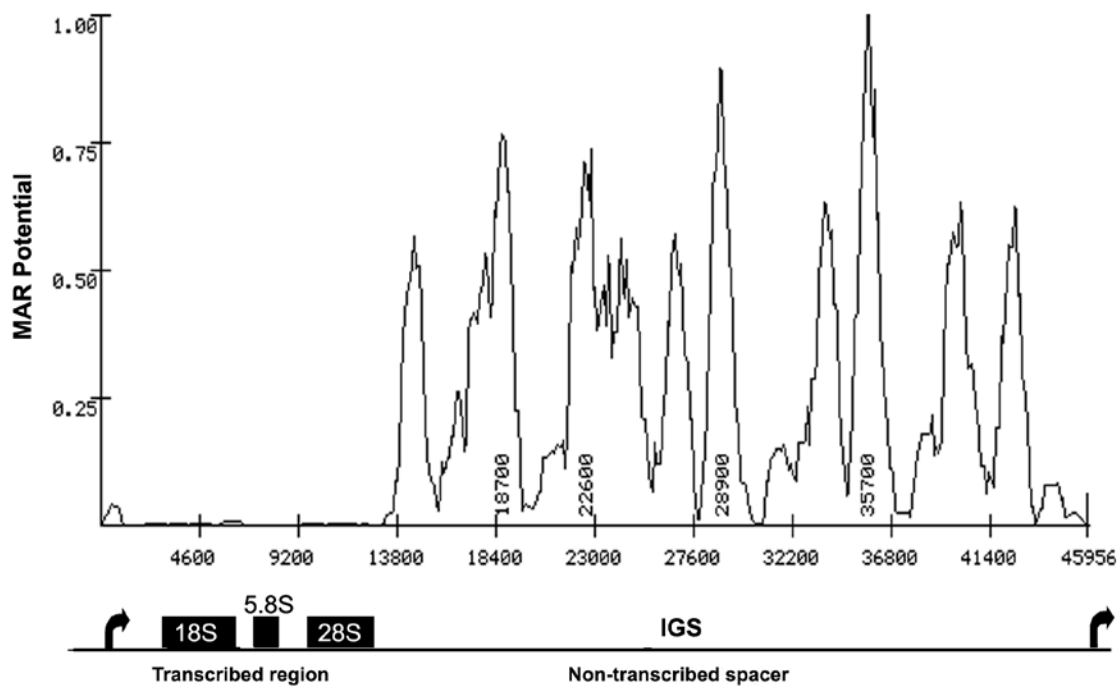

Figure 2

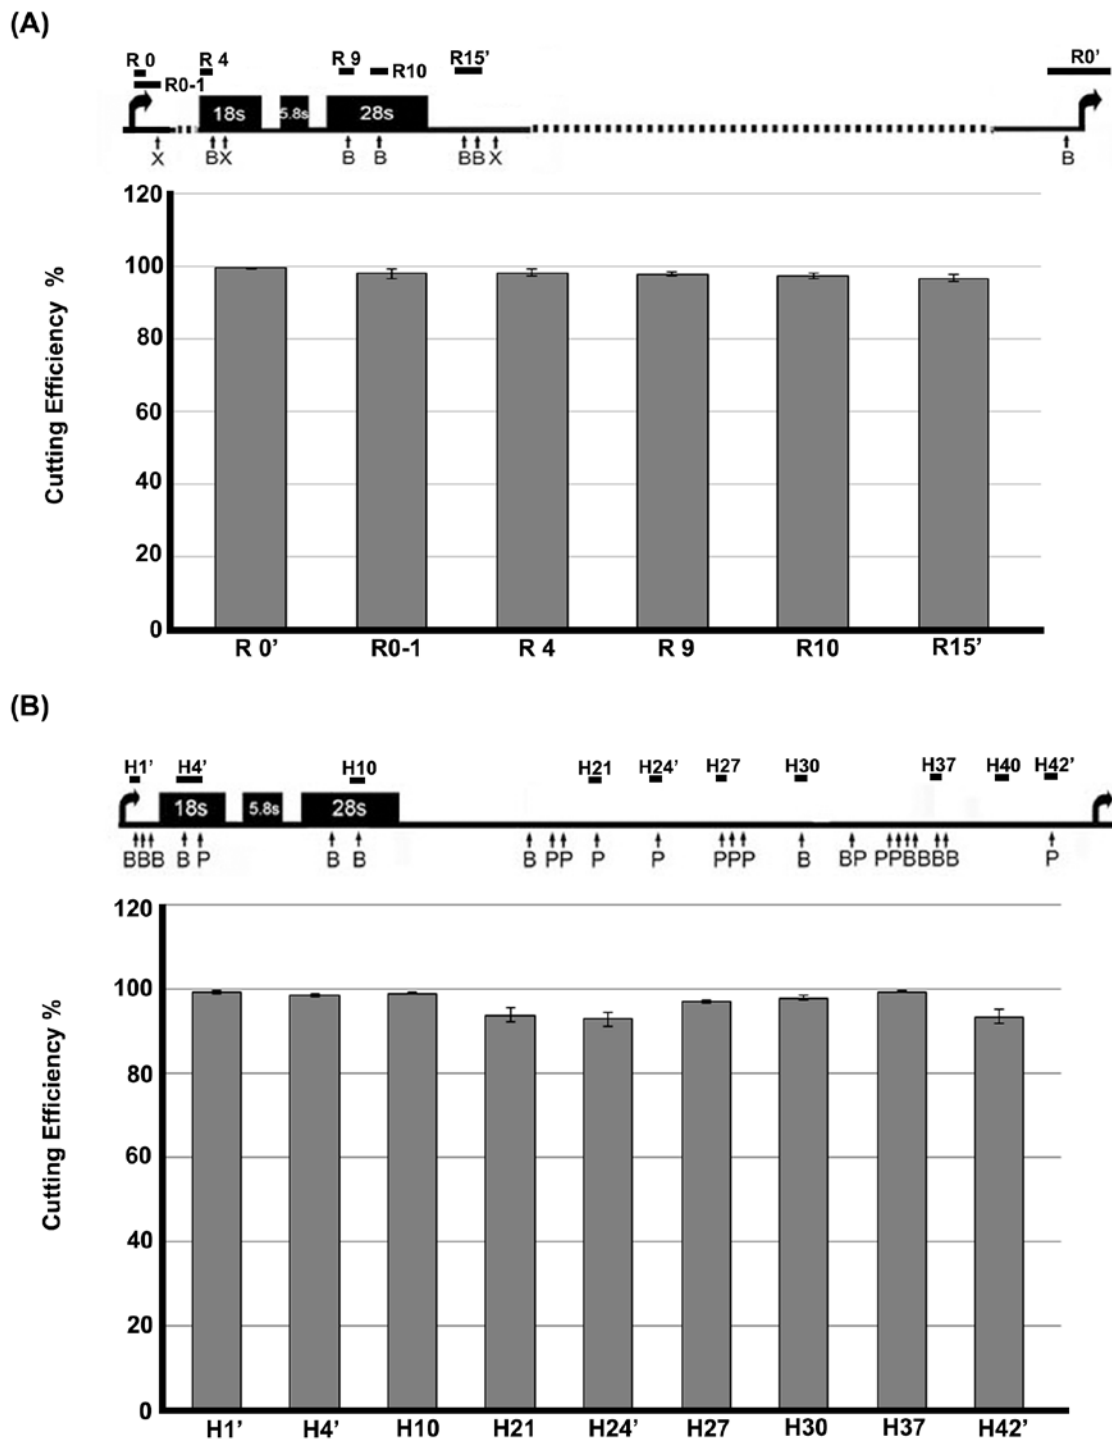

Figure 2

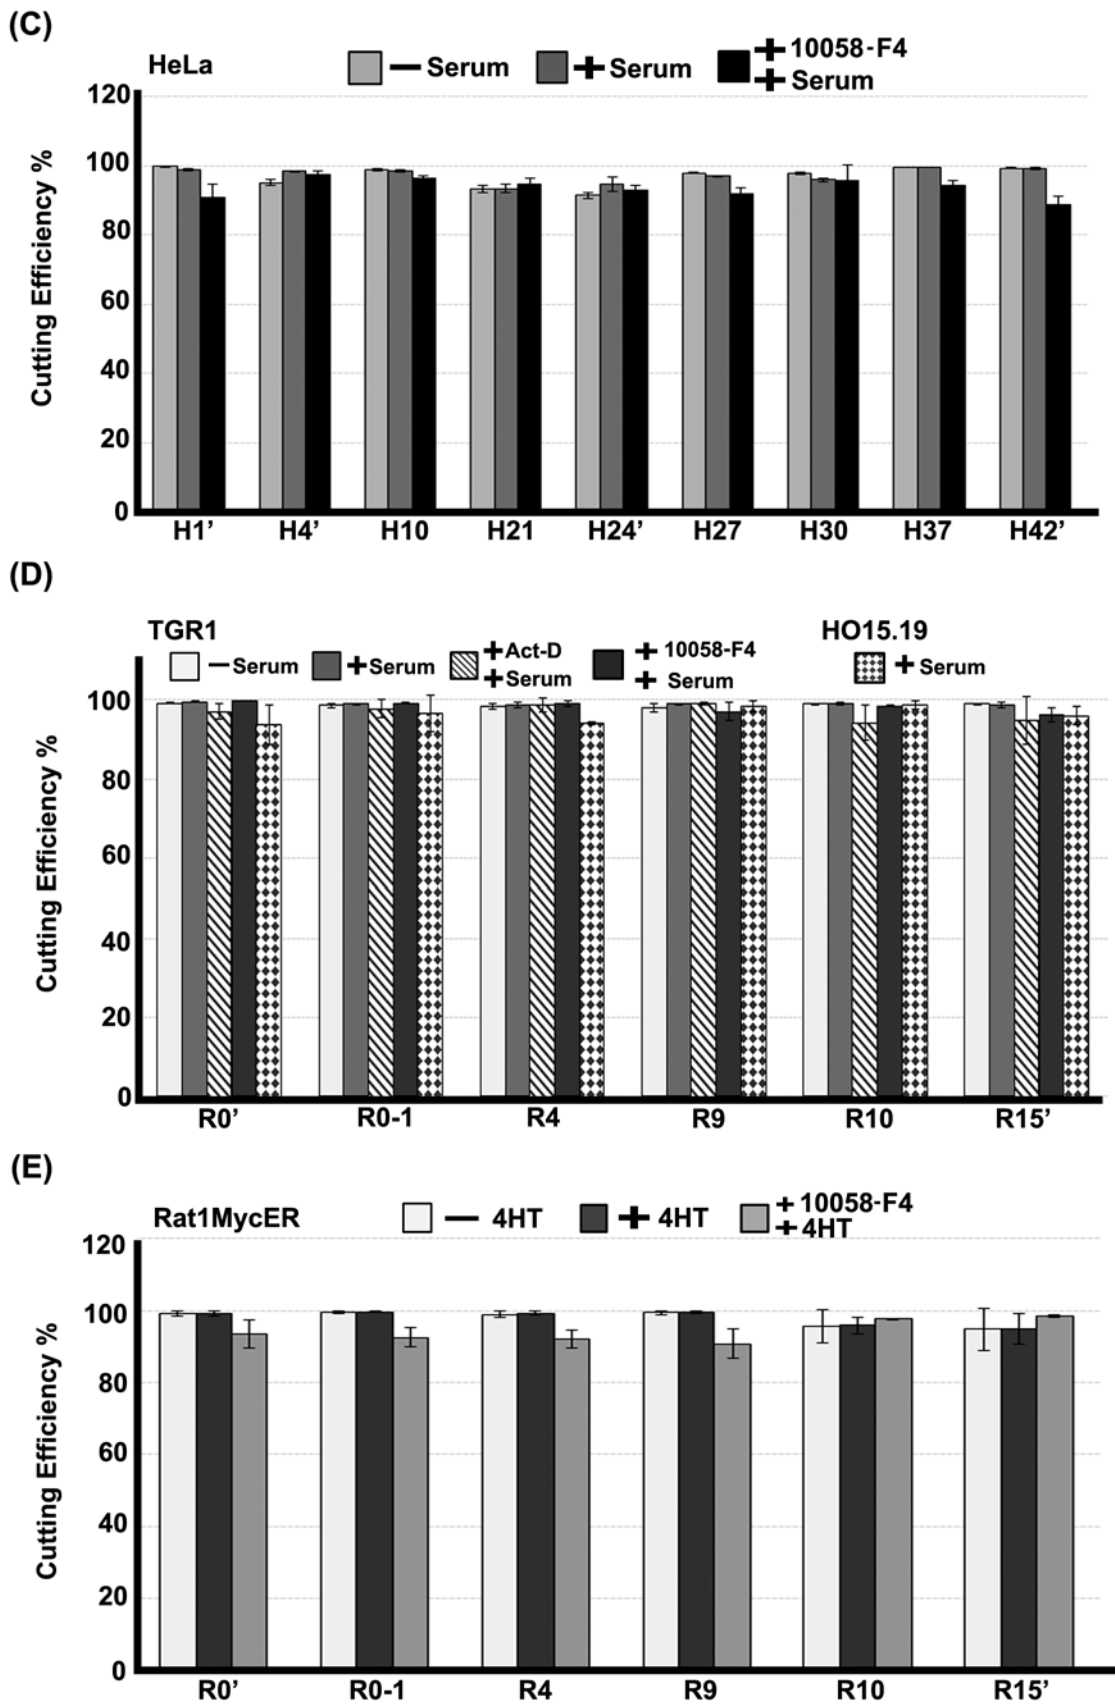

Figure 3

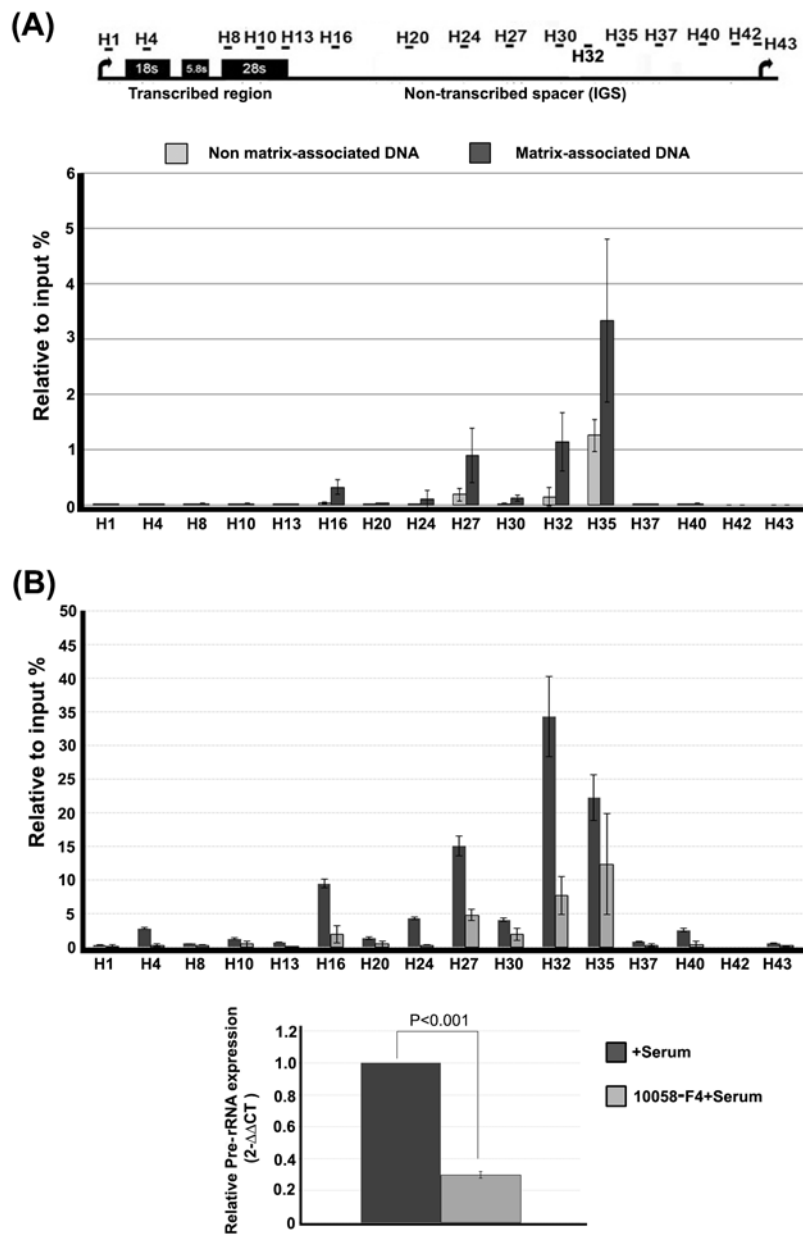

Figure 4

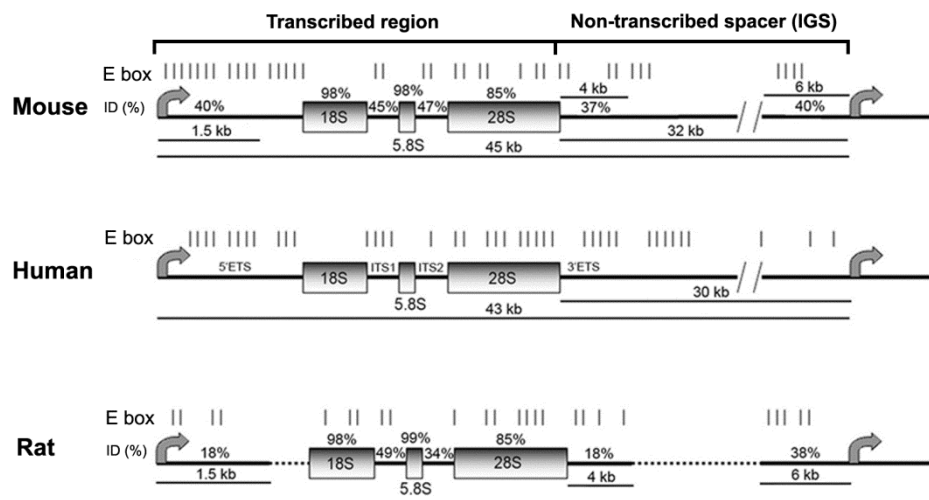



Figure 5

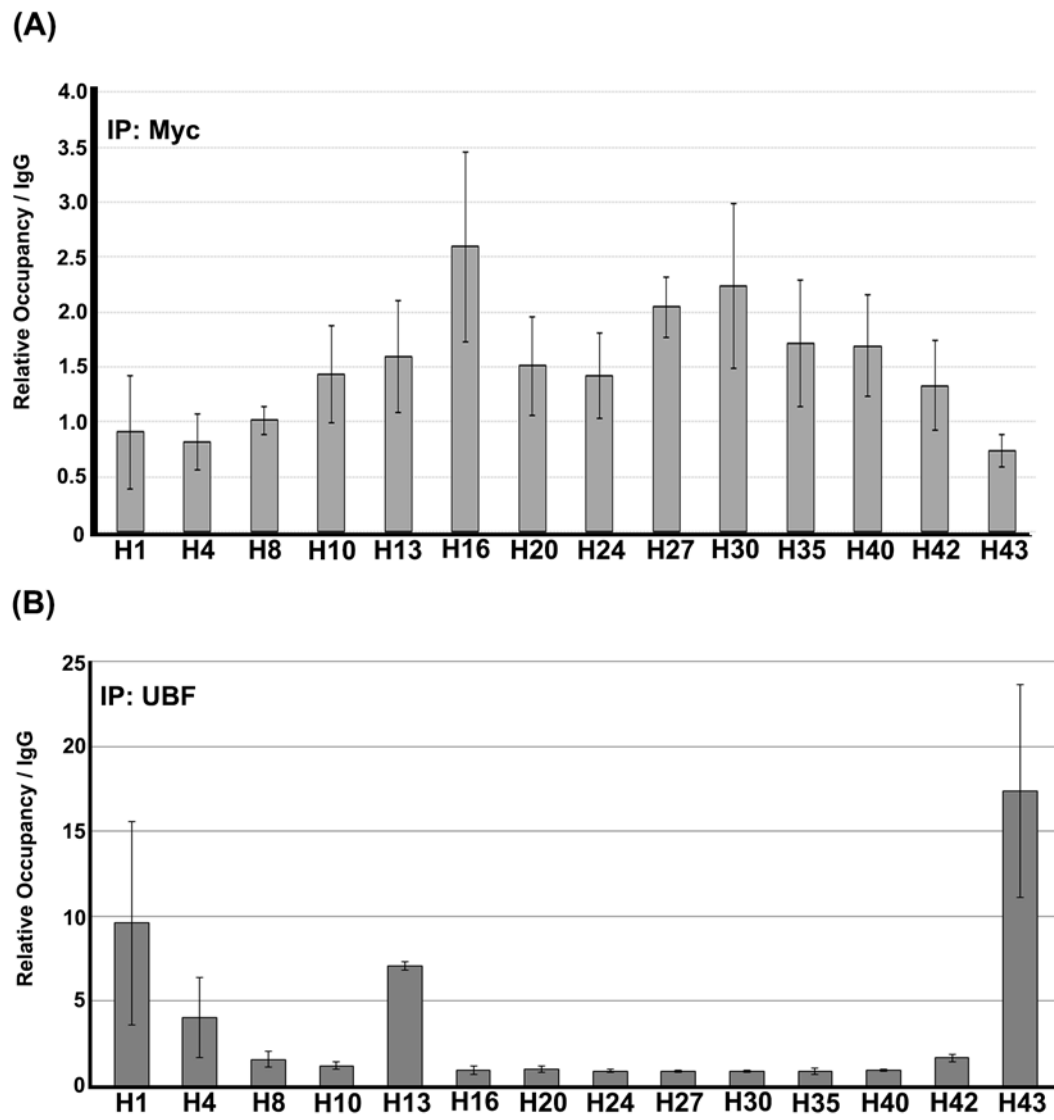

**Table 1. Human ribosomal DNA primer pairs used to detect rRNA gene in MAR and ChIP assays**

| Region | Corresponding site #                    |                                       |
|--------|-----------------------------------------|---------------------------------------|
|        | Forward                                 | Reverse                               |
| 47S*   | TGTCAGGCGTTCTCGTCTC (307-325)           | GACGTCACCACATCGATCAC (437-420)        |
| H 1    | CTCCGGGTTGTCCCTCAGGTG (821-842)         | ACGTGCGCTCACCGAGAGCAG (1030-1010)     |
| H 1'   | AAAAGCCTTCTCTAGCGATCTGAG (1402-1425)    | TACCATAACGGAGGCAGAGACAG (1489-1467)   |
| H 4    | CGACGACCCATTGGAACGTCT (3990-4010)       | CTTGATGTGGTAGCCGTTTCTC (4122-4100)    |
| H 4'   | AGAAACGGCTACCACATCCAAGG (4101-4123)     | TCATGGCCTCAGTTCGAAAACC (4572-4550)    |
| H 8    | GTAACGGCGAGTGAACAGGGAAG (8029-8041)     | GCCGGTATTTAGCCTTAGATGGAG (8268-8245)  |
| H10    | TAACGCGACCGATCCCGGAGAA (10501-10522)    | CCTTAGAGCCAATCCTTATCCCG (10818-10796) |
| H13    | ACCTGGCGCTAAACCATTCTGAG (12855-12877)   | GGACAAACCCTTGTGTCGAGG(12970-12959)    |
| H16    | ACACACACACACCCCGTAGTG (15816-15836)     | ACGTGTATGTAATGAAATGGG (15937-15916)   |
| H20    | TTATTCCTTCCTGGAGTTGG (20241-20261)      | CAGTTTTTCAGCCCCAACACAC (20376-20356)  |
| H21    | AAGTGTGTGTTCCCGTGAGAGTG (21619-21641)   | CACAGAGAGAAAAGACAGAGAC (22120-22100)  |
| H24    | TTCACGTCTGTCATCCCGAGGTC (24151-24173)   | CCTGACTCCATTTCTGATTTTC (24244-24223)  |
| H24'   | TTCACGTCTGTCATCCCGAGGTC (24151-24173)   | AACAGACAGAGAGAAGGCCCTAG (24548-24526) |
| H27    | AAATACAAAGCTGAGTCGGGAGC (27634-27656)   | GTCGACTTTCAATAACAGTGGCC (27915-27893) |
| H29    | GTAGGCCAATGCTGCTGCTGCTC (28981-29003)   | AAGACAGACACAGTGAGAGAGAC (29321-29299) |
| H30    | CTTGTTGGAACCACTGGCTCTTTGA (30795-30818) | TGCAGAGGTATCCATTTGACCTC (30992-30970) |
| H32    | TAACTACCACAGGGTTATGAC (32620-32640)     | GTATAAAGATTAGCTGGGCGTGG (32862-32840) |
| H35    | CTGGCTTTTCCCCCTATTTTAC (35118-35140)    | CAGCAAGCTTCGAGAAGGGGATC (35364-35342) |
| H37    | TTCACCGTGTGCCAAGGCTTG (37316-37338)     | TCTGCCGTGAAACTGTCTGTC (37464-37444)   |
| H40    | GTTTCACTCTGTTTCCACGGC (40739-40760)     | ACACAAACATCAGCCAAGCCAG (40896-40875)  |
| H42'   | TTCGCCATCTGTCTCTTTTCCC (41711-41732)    | TCTCTGGAGATGCCTCTCGGAAG (41901-41879) |
| H42    | AGGCAGAGACGCGTTTTGGGCAC (41939-41961)   | TGACTCACAAGCGACCCGCCA (42271-42251)   |
| H43    | GCTCCGTGTGTGGCTGCGATG (42839-42859)     | GACGCGGAGAGAACAGCAGG (152-132)        |

# sequence derived from GeneBank no. U13369

★ primers for 47S in quantitative analysis of Pre-rRNA transcription

Table 2. Rat ribosomal DNA primer pairs used to detect rRNA gene in MAR assays

| Region           | Corresponding site.                                   |                                                   |
|------------------|-------------------------------------------------------|---------------------------------------------------|
|                  | Forward                                               | Reverse                                           |
| R -4             | AGTGCAAGGCCTTGGGTTCTGTC (129-151) <sup>!</sup>        | AAAGCAGCCAGAAGCCTCAGACC (335-303) <sup>!</sup>    |
| R -2             | GGAGAGACGGAATGAGTGTGTG (2709-2730) <sup>!</sup>       | CCCGCCTGCTTGCCTGTCAC (2905-2886) <sup>!</sup>     |
| R 0'             | GCGCCTCCGAGACTTTCTTTTTTC (1481-1504) <sup>&amp;</sup> | CATGGACCTCTATATACGAC (262-243) <sup>@</sup>       |
| R 0 <sup>*</sup> | TATCTACCATGGCCTCCTCGG (43-64) <sup>@</sup>            | CATGGACCTCTATATACGAC (262-243) <sup>@</sup>       |
| R0-1             | TATCTACCATGGCCTCCTCGG (43-64) <sup>@</sup>            | GCACGGGAAGAAGTCGCTAAC (954-934) <sup>@</sup>      |
| R 4              | CCCTGTAATTGGAATGAGTCCAC (550-572) <sup>#</sup>        | CCATTATTCCTAGCTGCGGTATC (872-850) <sup>#</sup>    |
| R 5              | CATGGCCGTTCTTAGTTGGTGG (1335-1356) <sup>#</sup>       | ACGCTGAGCCAGTTCAGTGTAG (1554-1533) <sup>#</sup>   |
| R 8              | GGGAAATGTGGCGTACGGAAGAC (4005-4027) <sup>#</sup>      | CTCGTGCCGGTATTAGCCTTAG (4208-4187) <sup>#</sup>   |
| R 9              | ACGGACCAAGGAGTCTAACG (5086-5105) <sup>#</sup>         | CCAGAGTTTCTCTGCTTCG (5332-5313) <sup>#</sup>      |
| R 10             | TGTAGGTAAGGGAAGCGCAAG (6559-6538) <sup>#</sup>        | CCCTTAGAGCCAATCCTTATCCC (6598-6576) <sup>#</sup>  |
| R 13             | CGGTACACCTGTCAAACGGTAAC (7781-7803) <sup>#</sup>      | TAGAGGCGTTCAGTCATAATCCC (8282-8259) <sup>#</sup>  |
| R 14             | TCAGACACACCAGAAGAAGGC (1861-1881) <sup>□</sup>        | AGAGAAAGGGGAATTGGATACTGG (2110-2087) <sup>□</sup> |
| R 15'            | GCGATCTGGGGAGTTGCTTTTC (2028-2049) <sup>□</sup>       | TGCACAACCATCATTGGAGGACG (2461-2439) <sup>□</sup>  |
| R 15             | AGGAGGATGAGGAGGAGGAAAG (2605-2626) <sup>□</sup>       | TTAAGTTGAGCAGAGCAGAGCAG (2842-2820) <sup>□</sup>  |
| R 16             | CTCTGGAGGAACACGGTCAGAAC (3651-3663) <sup>□</sup>      | GAATTCATCTGTGCGTCCCGCAG (4025-4003) <sup>□</sup>  |

<sup>!</sup> sequence derived from GeneBank no. X04084

<sup>&</sup> sequence derived from GeneBank no. X61110

<sup>@</sup> sequence derived from GeneBank no. X00677

<sup>#</sup> sequence derived from GeneBank no. V01270

<sup>□</sup> sequence derived from GeneBank no. X03695

<sup>\*</sup> primers for 45S in quantitative analysis of Pre-rRNA transcription

**Table 3. Rat rDNA primer pair used for syntheses of control fragments in chromatin conformation capturing & MAR-loop assays**

| Primer             | corresponding site                                    |                                                      |
|--------------------|-------------------------------------------------------|------------------------------------------------------|
|                    | Forward                                               | Reverse                                              |
| <b>r0</b>          | TTCCAGGATCCTCCGGTCC (1601-1620) <sup>!</sup>          | CATAAAGCTGCCCCAGAGAG (460-441) <sup>#</sup>          |
| <b>r4</b>          | AAACGGCTACCACATCCAAGG (449-469) <sup>&amp;</sup>      | CTGATCGTCTTCGAACCTCCG (1063-1043) <sup>&amp;</sup>   |
| <b>r9</b>          | ACGGACCAAGGAGTCTAACG (5086-5105) <sup>&amp;</sup>     | CCAGAGTTTCTCTGCTTCG (5332-5313) <sup>&amp;</sup>     |
| <b>r10</b>         | ATCGAAAGGGAGTCGGGTTTCCAG (6209-6230) <sup>&amp;</sup> | CCCTTAGAGCCAATCCTTATCCC (6598-6576) <sup>&amp;</sup> |
| <b>r14,r15,r16</b> | TCAGACACACCAGAAGAAGGC (1861-1881) <sup>%</sup>        | CAAGCTTTCCTCCTCATCC (2630-2609) <sup>%</sup>         |

<sup>!</sup> sequence derived from GeneBank no. X61110

<sup>#</sup> sequence derived from GeneBank no. X00677

<sup>&</sup> sequence derived from GeneBank no. V01270

<sup>%</sup> sequence derived from GeneBank no. X03695

Table 4. Rat rDNA primer used in MAR-loop assays

| Primer     | Corresponding site                                     |
|------------|--------------------------------------------------------|
| <b>r0</b>  | <b>CATAAAGCTGCCCCAGAGAG (460-441)<sup>α</sup></b>      |
| <b>r4</b>  | <b>CTGATCGTCTTCGAACCTCCG (1063-1043)<sup>%</sup></b>   |
| <b>r9</b>  | <b>CCAGAGTTTCCTCTGCTTCG (5332-5313)<sup>%</sup></b>    |
| <b>r10</b> | <b>CCCTTAGAGCCAATCCTTATCCC (6598-6576)<sup>%</sup></b> |
| <b>r14</b> | <b>GCGATCTGGGGAGTTGCTTTTC (2038-2049)<sup>#</sup></b>  |
| <b>r15</b> | <b>ACCACCGACTTGTAGGGATCC (2367-2387)<sup>#</sup></b>   |
| <b>r16</b> | <b>TGCACAACCATCATTGGAGGACG (2462-2448)<sup>#</sup></b> |

! sequence derived from GeneBank no. X61110  
# sequence derived from GeneBank no. X03695  
& sequence derived from GeneBank no. X00677  
% sequence derived from GeneBank no. V01270

**Table 5. Human rDNA primer pair used for syntheses of control fragments in chromatin conformation capturing & MAR-loop assays**

| Primer | Corresponding site <sup>#</sup>       |                                        |
|--------|---------------------------------------|----------------------------------------|
|        | Forward                               | Reverse                                |
| h1     | AAAAGCCTTCTCTAGCGATCTGAG (1403-1425)  | TACCATAACGGAGGCAGAGACAG (1489-1467)    |
| h4     | AGAAACGGCTACCACATCCAAGG (4101-4123)   | TCATGGCCTCAGTTCCGAAAACC (4572-4550)    |
| h9     | TGAAACACGGACCAAGGAGT (9241-9260)      | TGAGGGAAACTTCGGAGGGAACC (9600-9578)    |
| h10    | TAACGCGACCGATCCCGGAGAA (10501-10522)  | CCTTAGAGCCAATCCTTATCCCG (10818-10796)  |
| h18    | TAGGAGAGGTATGGGAGAGGAC (17858-17879)  | CTGGAGAAAGGGAAGAGAAGAGG (18311-18289)  |
| h21    | AAGTGTGTGTTCCCGTGAGAGTG (21619-21641) | CACAGAGAGAAAGACAGAGAC (22120-22100)    |
| h24    | TTCACGTCTGTCATCCCGAGGTC (24151-24173) | AACAGACAGAGAGAAGGCCCTAG (24548-24526)  |
| h27    | AAATACAAAGCTGAGTCGGGAGC (27634-27656) | GTCGACTTTCATAACAGTGGCC (27915-27893)   |
| h28    | CACCGTTTTGAAGATGGGGG (28381-28401)    | GGCGGAGAACTAAAACATCG (28594-28574)     |
| h37    | GTAGAGATGGGGTTTCACTGTGG (37110-37132) | AGAATGAGTTTAAGCACGCCAGCC (37494-37471) |
| h42    | TTCGCCATCTGTCTCTTTTCCC (41711-41732)  | TCTCTGGAGATGCCTCTCGGAAG (41901-41879)  |

# sequence derived from GeneBank no. U13369

Table 6. Human rDNA primer used in chromatin conformation capturing &amp; MAR-loop assays

| Primer | Corresponding site #                  |
|--------|---------------------------------------|
| h1     | TACCATAACGGAGGCAGAGACAG (1489-1467)   |
| h4     | AGAAACGGCTACCACATCCAAGG (4101-4123)   |
| h9     | ATTGACAGTCAGGACCGCTAC (9523-9502)     |
| h10    | TAACGCGACCGATCCCGGAGAA (10501-10522)  |
| h18    | AGTCCACCCTGTACGTCAACC (18174-18154)   |
| h21    | CACAGAGAGAAAGACAGAGAC (22120-22100)   |
| h24    | AACAGACAGAGAGAAGGCCCTAG (24548-24526) |
| h27    | GTCGACTTTCAATAACAGTGGCC (27915-27893) |
| h28    | GGCGGAGAAACTAAAACATCG (28594-28574)   |
| h37    | TCTGCCGTGAAACTGTCTGTC (37464-37444)   |
| h42    | TCGCCATCTGTCTTTTCCC (41711-41732)     |

# sequence derived from GeneBank no. U13369
